# Supplementary material for: Aminopolycarboxylic Acids-Functionalized Chitosan-Based Composite Cryogels as Valuable Heavy Metal Ions Sorbents: Fixed-Bed Column Studies and Theoretical Analysis
Source: MDPI journal article supplement (doi:10.3390/gels8040221), 2022-04-05
Supplement: s1 [file s1]

## Article

# Aminopolycarboxylic Acids-Functionalized Chitosan-Based Composite Cryogels as Valuable Heavy Metal Ions Sorbents: Fixed-Bed Column Studies and Theoretical Analysis

Maria Valentina Dinu <sup>1,\*</sup>, Ionel Humelnicu <sup>2</sup>, Claudiu Augustin Ghiorghita <sup>1</sup> and Doina Humelnicu <sup>2</sup>

<sup>1</sup> “Mihai Dima” Department of Functional Polymers, “Petru Poni” Institute of Macromolecular Chemistry, Grigore Ghica Voda Alley 41A, 700487 Iasi, Romania; claudiu.ghiorghita@icmpp.ro

<sup>2</sup> Faculty of Chemistry, “Al. I. Cuza” University of Iasi, Carol I Bd. 11, 700506 Iasi, Romania; ionel@uaic.ro (I.H.); doinah@uaic.ro (D.H.)

\* Correspondence: vdinu@icmpp.ro

## Supporting Information

**Table S1.** Parameters corresponding to Thomas and Yoon-Nelson models fitted for each HMI on CS<sub>EDTA</sub>-CPL column.

| HMI    | Thomas               |              |        | Yoon-Nelson          |              |        |
|--------|----------------------|--------------|--------|----------------------|--------------|--------|
|        | $k_{TH}$ (L/min·mg)  | $q_0$ (mg/g) | $R^2$  | $k_{YN}$ (mL/min·mg) | $\tau$ (min) | $R^2$  |
| Co(II) | $1.55 \cdot 10^{-4}$ | 79.57        | 0.9365 | $3.83 \cdot 10^{-2}$ | 66.43        | 0.9365 |
| Zn(II) | $6.29 \cdot 10^{-5}$ | 130.03       | 0.8888 | $1.55 \cdot 10^{-2}$ | 108.56       | 0.8888 |
| Cd(II) | $4.10 \cdot 10^{-5}$ | 158.72       | 0.8173 | $1.01 \cdot 10^{-2}$ | 132.51       | 0.8173 |
| Pb(II) | $3.31 \cdot 10^{-5}$ | 166.78       | 0.7950 | $8.16 \cdot 10^{-3}$ | 139.24       | 0.7950 |
| Ni(II) | $3.52 \cdot 10^{-5}$ | 249.53       | 0.8594 | $8.68 \cdot 10^{-3}$ | 208.34       | 0.8594 |

**Table S2.** Sorption performance of various sorbents reported in the literature compared with that of our CS<sub>EDTA</sub>-CPL sorbents.

| Sorbent                                      | Metal ion                                      | pH            | Sorption operation conditions | q <sub>0</sub> , mg/g                         | Refs.      |
|----------------------------------------------|------------------------------------------------|---------------|-------------------------------|-----------------------------------------------|------------|
| Zeolite-supported nanoscale zero-valent iron | Pb(II)<br>Cd(II)                               | 6             | batch                         | 85.37<br>48.63                                | [1]        |
| Iron coating zeolite                         | Pb(II)<br>Cd(II)<br>Zn(II)                     | 6.5           | batch                         | 6.54<br>4.20<br>3.72                          | [2]        |
| Iron coating zeolite                         | Pb(II)<br>Cd(II)<br>Zn(II)                     | 6.5           | column                        | 1.03<br>0.93<br>0.83                          | [2]        |
| Lemon peel-based biomaterial                 | Cd(II)<br>Co(II)<br>Ni(II)<br>Pb(II)           | 5             | batch                         | 7.34<br>5.63<br>5.73<br>8.17                  | [3]        |
| PVP hydrogel                                 | Ni(II)<br>Zn(II)<br>Cd(II)                     | 8             | batch                         | 7.52<br>26.78<br>4.35                         | [4]        |
| P(VP-co-MA) hydrogel                         | Ni(II)<br>Zn(II)<br>Cd(II)                     | 8             | batch                         | 60.15<br>48.92<br>29.82                       | [4]        |
| FAU-type zeolite                             | Pb(II)<br>Cd(II)<br>Zn(II)<br>Co(II)           | Not specified | batch                         | 109.9<br>53.5<br>36.8<br>12.2                 | [6]        |
| Mesoporous magnetite nanoparticles           | Pb(II)<br>Cd(II)<br>Ni(II)                     | 5.5           | batch                         | 85<br>79<br>66                                | [7]        |
| Copper-imprinted CS-based cryogel            | Ni(II)<br>Zn(II)                               | 4.5<br>5      | batch                         | 77.67<br>84.14                                | 8          |
| CS <sub>EDTA</sub> -CPL                      | Co(II)<br>Zn(II)<br>Cd(II)<br>Pb(II)<br>Ni(II) | 4.5           | column                        | 79.57<br>130.03<br>158.72<br>166.78<br>249.53 | this study |

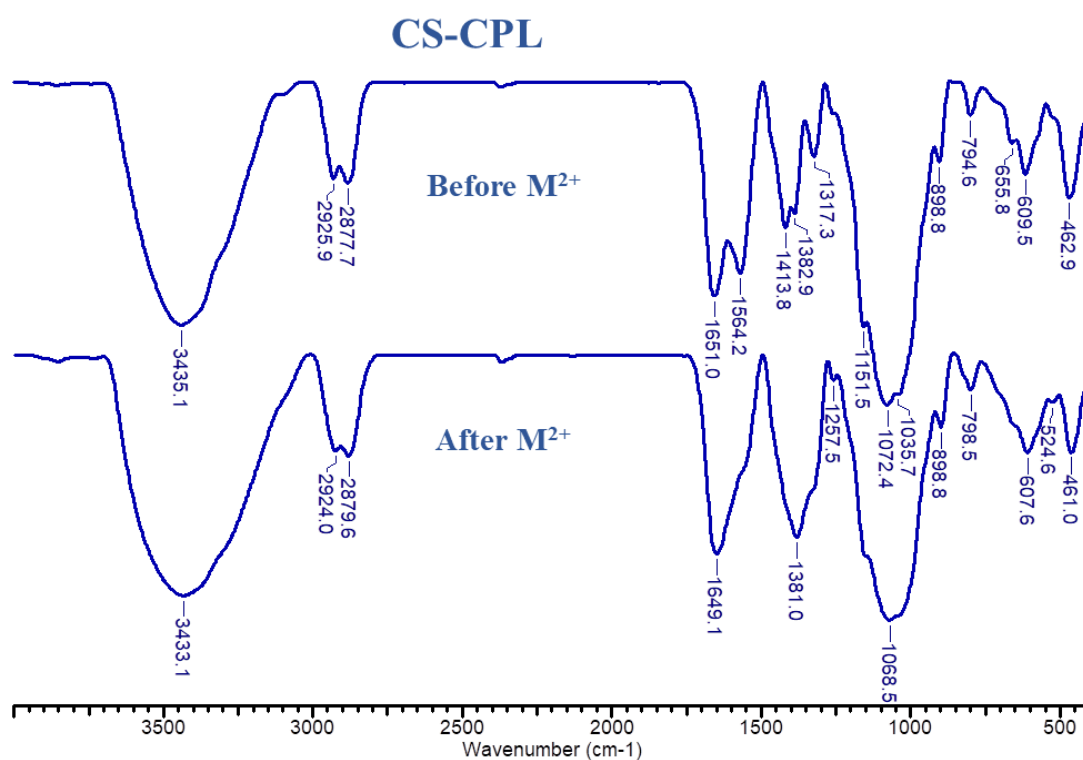

**Figure S1.** FT-IR spectra of CS-CPL composites before and after interaction with HMIs.

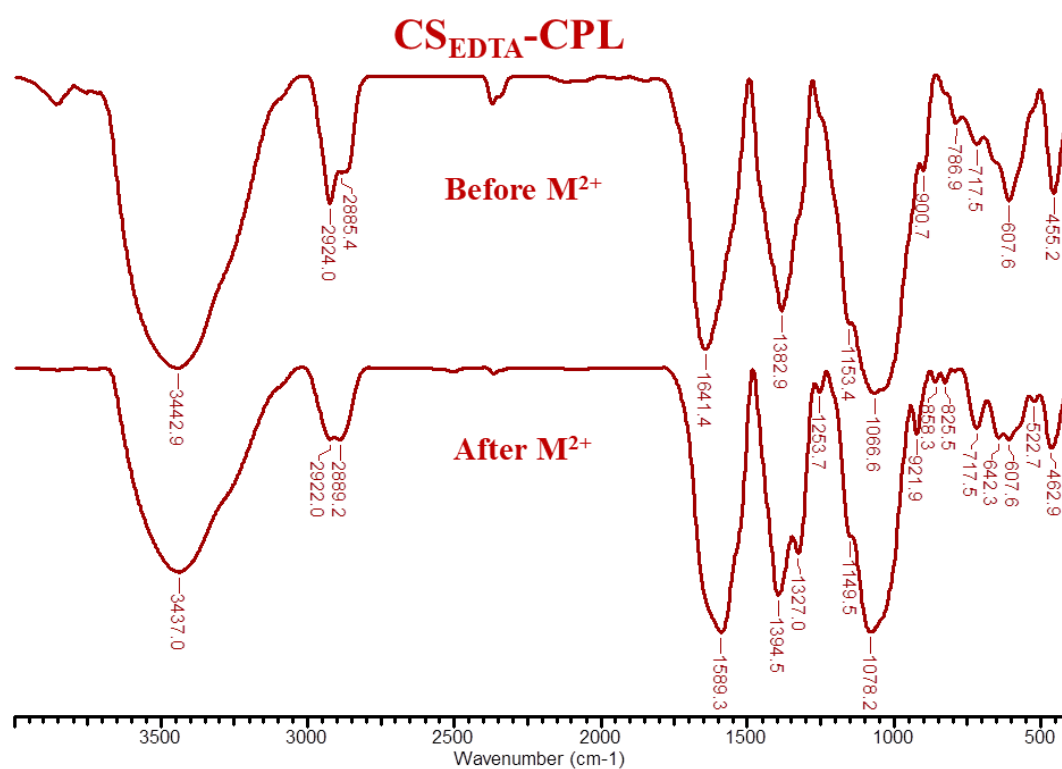

**Figure S2.** FT-IR spectra of CS<sub>EDTA</sub>-CPL composites before and after interaction with HMIs.

## References

1. Li, Z.; Wang, L.; Meng, J.; Liu, X.; Xu, J.; Wang, F.; Brooks, P., Zeolite-supported nanoscale zero-valent iron: New findings on simultaneous adsorption of Cd(II), Pb(II), and As(III) in aqueous solution and soil. *J. Hazard. Mater.* **2018**, *344*, 1–11.
2. Nguyen, T. C.; Loganathan, P.; Nguyen, T. V.; Vigneswaran, S.; Kandasamy, J.; Naidu, R., Simultaneous adsorption of Cd, Cr, Cu, Pb, and Zn by an iron-coated Australian zeolite in batch and fixed-bed column studies. *Chem. Eng. J.*, **2015**, *270*, 393–404.
3. Šabanović, E.; Memić, M.; Sulejmanović, J.; Selović, A., Simultaneous adsorption of heavy metals from water by novel lemon-peel based biomaterial, *Polish J. Chem. Technol.*, **2020**, *22*, 46–53.
4. Kemik, Ö.F.; Ngwabebhoh, F.A.; Yildiz, U., A response surface modelling study for sorption of Cu<sup>2+</sup>, Ni<sup>2+</sup>, Zn<sup>2+</sup> and Cd<sup>2+</sup> using chemically modified poly(vinylpyrrolidone) and poly(vinylpyrrolidone-co-methylacrylate) hydrogels. *Adsorp. Sci. Technol.*, **2017**, *3*, 263–283.
5. Joseph, I.V.; Tosheva, L.; Doyle, A. M., Simultaneous removal of Cd(II), Co(II), Cu(II), Pb(II), and Zn(II) ions from aqueous solutions via adsorption on FAU-type zeolites prepared from coal fly ash. *J. Environm. Chem. Eng.*, **2020**, *8*, 103895.
6. Fato, P.F.; Li, D.W.; Zhao, L.J.; Qiu, K.; Long, Y.T., Simultaneous Removal of Multiple Heavy Metal Ions from River Water Using Ultrafine Mesoporous Magnetite Nanoparticles, *ACS Omega*, **2019**, *4*, 7543–7549.
7. Humelnicu, D.; Lazar, M.M.; Ignat, M.; Dinu, I.A.; Dragan, E.S.; Dinu, M.V., Removal of heavy metal ions from multi-component aqueous solutions by eco-friendly and low-cost composite sorbents with anisotropic pores, *J. Hazard. Mater.*, **2020**, *381*, 120980.
